# Supplementary material
Source: ML conference proceedings conference paper supplement (https://openaccess.thecvf.com/content/CVPR2026/html/Shi_Bulk_RNA-seq_Guided_CVPR_2026_paper.html)
Supplement: Supplementary file 1 [file Shi_Bulk_RNA-seq_Guided_CVPR_2026_supplemental.pdf]

# Bulk RNA-seq Guided Multi-modal Detection of Anomalous Regions in Human Cancer via Spatial Transcriptomics

## Supplementary Material

### 6. Details of Baseline Methods

To comprehensively benchmark the performance of our proposed framework, we compare it with a diverse set of state-of-the-art (SOTA) approaches spanning four methodological categories.

**Uni-modal histopathology-based methods.** This group includes **SimpleNet**[33], which adapts pre-trained feature extractors using a lightweight discriminator against synthetic noise; **THOR**[6], which employs a diffusion model to identify anomalies through deviations from a restored norm; **BIHN**[61], a dual-branch network integrating local and global visual cues; and **AnoDDPM**[30], which leverages denoising diffusion models to localize anomalies via pixel-wise residuals.

**Uni-modal ST-based methods.** Representative examples include **FICT**[43], a probabilistic generative model jointly capturing gene expression and spatial structure; **Giotto**[12], which constructs spatial networks derived from tissue topology; **SEDR**[50], combining a variational autoencoder with graph convolutional layers to generate unified embeddings; and **SpaGIC**[32], which enhances variational graph autoencoders with adversarial learning for modeling spatial expression patterns.

**Multi-modal approaches integrating histology and gene expression.** This category comprises **MEATRD**[52], a three-stage fusion architecture leveraging multi-head attention; **STANDS**[51], which integrates spatial GCNs with adversarial domain alignment; **STAIG**[53], based on masked graph reconstruction; **STGIC**[57], enforcing gene embedding consistency through contrastive learning; and **stMMC**[27], which employs parallel graph autoencoders trained using contrastive objectives for multi-modal alignment.

**Transfer learning methods.** We additionally compare against representative transfer learning frameworks, including **Bulk2Space**[29], a spatial deconvolution model using non-negative matrix factorization; **DARE-GRAM**[37], which aligns domain-specific Gram matrices for regression-based transfer; **IRAD**[54], preserving relational consistency across domains with graph-based adaptation; **LOCIT**[46], performing localized unsupervised source instance selection; and **STEM**[19], which learns a shared encoder to maintain cross-modal consistency between domains.

### 7. Complexity Analysis

The overall computational complexity of our framework is primarily governed by two core components: the Dynamic Multi-Relational Graph Learning (DMRGL) module and the Optimal Transportation-based Gene Module Alignment (OTGMA) module.

#### 7.1. Complexity of DMRGL Module

The computational cost of the Dynamic Multi-Relational Graph Learning module can be decomposed into two phases:

*Dynamic Graph Construction:* At the initialization step ( $t = 0$ ), we build the graph using K-Nearest Neighbors (KNN) on spatial coordinates, which has a complexity of  $O(N_s \log N_s)$ , where  $N_s$  denotes the number of spots. For the subsequent refinement steps ( $t > 0$ ), the graph is dynamically updated based on cosine similarity in the gene feature space, requiring  $O(N_s^2 D)$  under a naive implementation.

*Graph Attention Convolution:* In this way, each node computes attention coefficients over its neighbors. Given a graph with average degree  $k$  (in our experiments,  $k = k_n = k_s$ ), the complexity per layer is  $O(N_s k D^2)$ , covering both linear transformations and attention computations across all neighbor pairs. Taking  $T$  dynamic refinement steps into account, the overall complexity is dominated by:

$$O(T \cdot (N_s^2 D + N_s k D^2)) \quad (14)$$

#### 7.2. Complexity of OTGMA Module

The OTGMA module consists of several computational components:

*Gene Similarity Computation:* For both the bulk and ST domains, constructing domain-specific gene similarity matrices requires computing  $D \times D$  pairwise gene correlations based on domain-specific samples. This results in a total complexity of  $O(D^2(N_b + N_s))$ , where  $N_b$  and  $N_s$  denote the numbers of bulk samples and spatial spots, respectively.

*Topological Overlap Matrices:* Generating topological overlap matrices (TOMs) for  $K$  gene modules across the two domains incurs a computational cost of  $O(KD^2)$ .

*Composition Alignment:* Computing Wasserstein distances between module Laplacians involves eigenvalue decomposition with worst-case complexity  $O(K^2 D^3)$ , though low-rank or approximate solvers can reduce this in practice to  $O(K^2 D^2)$ .

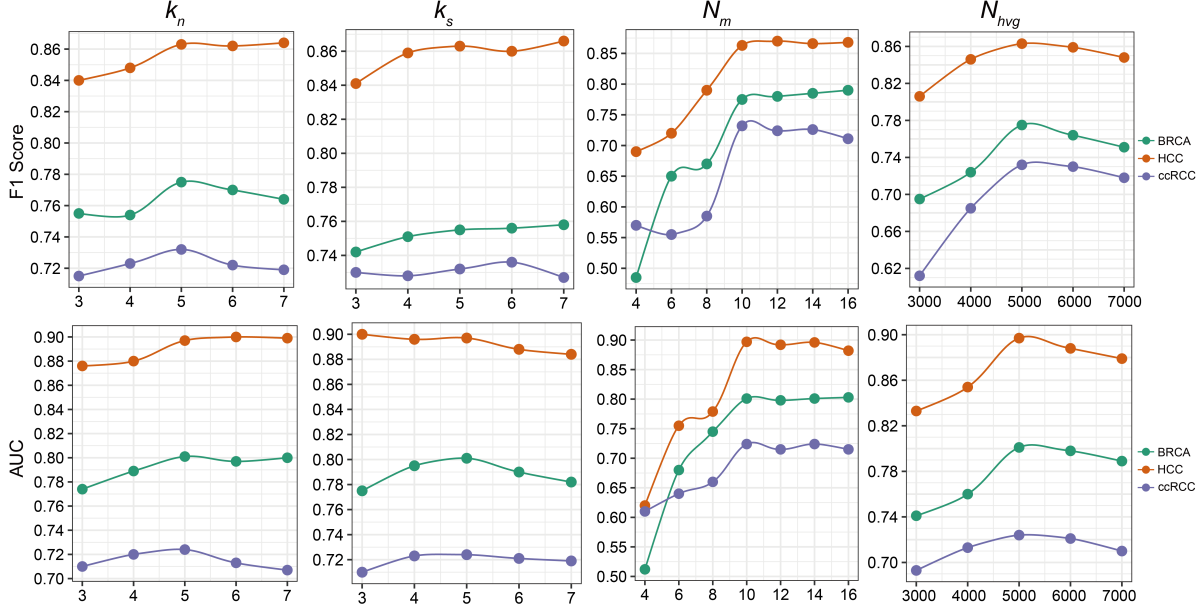

Figure 4. Parameter analysis results. We examine the effects of four parameters:  $k_n$ ,  $k_s$ ,  $N_m$ , and  $N_{hvg}$ .

*Functional Alignment:* Computing module centroids using the gene embeddings requires  $O(KDD_{\text{emb}})$  operations, followed by pairwise module distance computations with complexity  $O(K^2D_{\text{emb}})$ .

*Optimal Transport:* Solving the regularized optimal transport (OT) problem with the Sinkhorn algorithm has complexity  $O(K^2I)$ , where  $I$  is the number of Sinkhorn iterations.

Combining all components, the total computational complexity of the OTGMA module is:

$$O\left(D^2(N_b + N_s) + KD^2 + K^2D^3 + KDD_{\text{emb}} + K^2D_{\text{emb}} + K^2I\right) \quad (15)$$

## 8. Additional Result of Module Alignment

For the HCC cohort, the top bulk-ST module pairs predominantly highlighted pathways involved in metabolic homeostasis, xenobiotic and drug-processing responses, inflammatory activation, and extracellular-matrix remodeling. These functions are consistent with the hallmark metabolic rewiring[15], the impaired detoxification and xenobiotic-metabolism capacity observed in malignant hepatocytes[38], and the inflammation-driven micro-environmental remodeling characteristic of hepatocellular carcinoma[40].

In the case of clear cell renal cell carcinoma (ccRCC), the aligned module pairs revealed strong enrichment in immune regulatory processes, oncogenic signaling programs associated with hypoxia and metabolic reprogramming,

and spatially heterogeneous extracellular-matrix remodeling. These pathways correspond closely to the defining biological features of clear cell renal cell carcinoma, including VHL-HIF dysregulation[7] and a highly immune-infiltrated tumor microenvironment[48].

Across all datasets, the aligned module pairs showed consistent enrichment of cancer-relevant pathways. These results indicate that OTGMA achieves biologically meaningful bulk-ST module alignment and effectively reveals tumor-associated molecular processes.

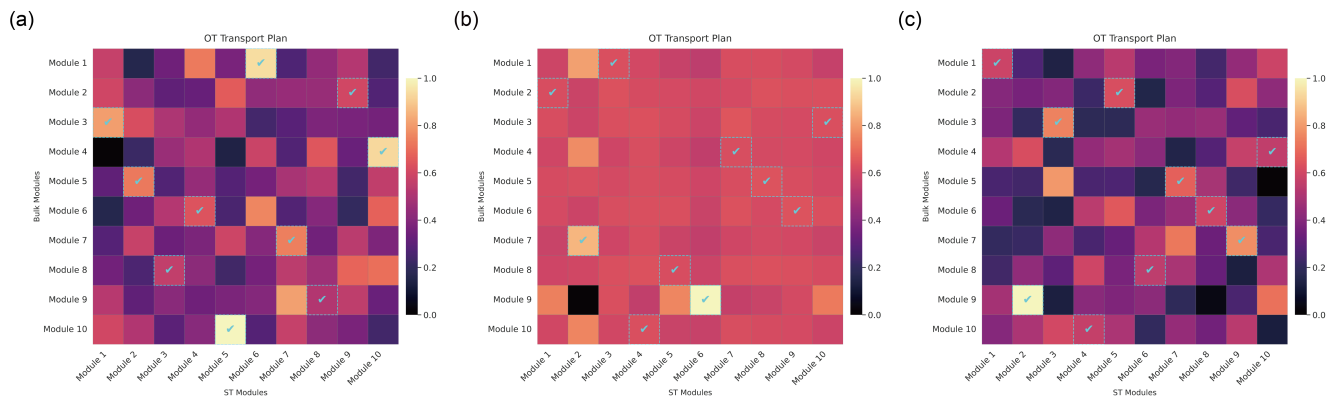

Figure 5. OT transport plan of bulk and ST modules on (a) BRCA, (b) HCC, and (c) ccRCC datasets.

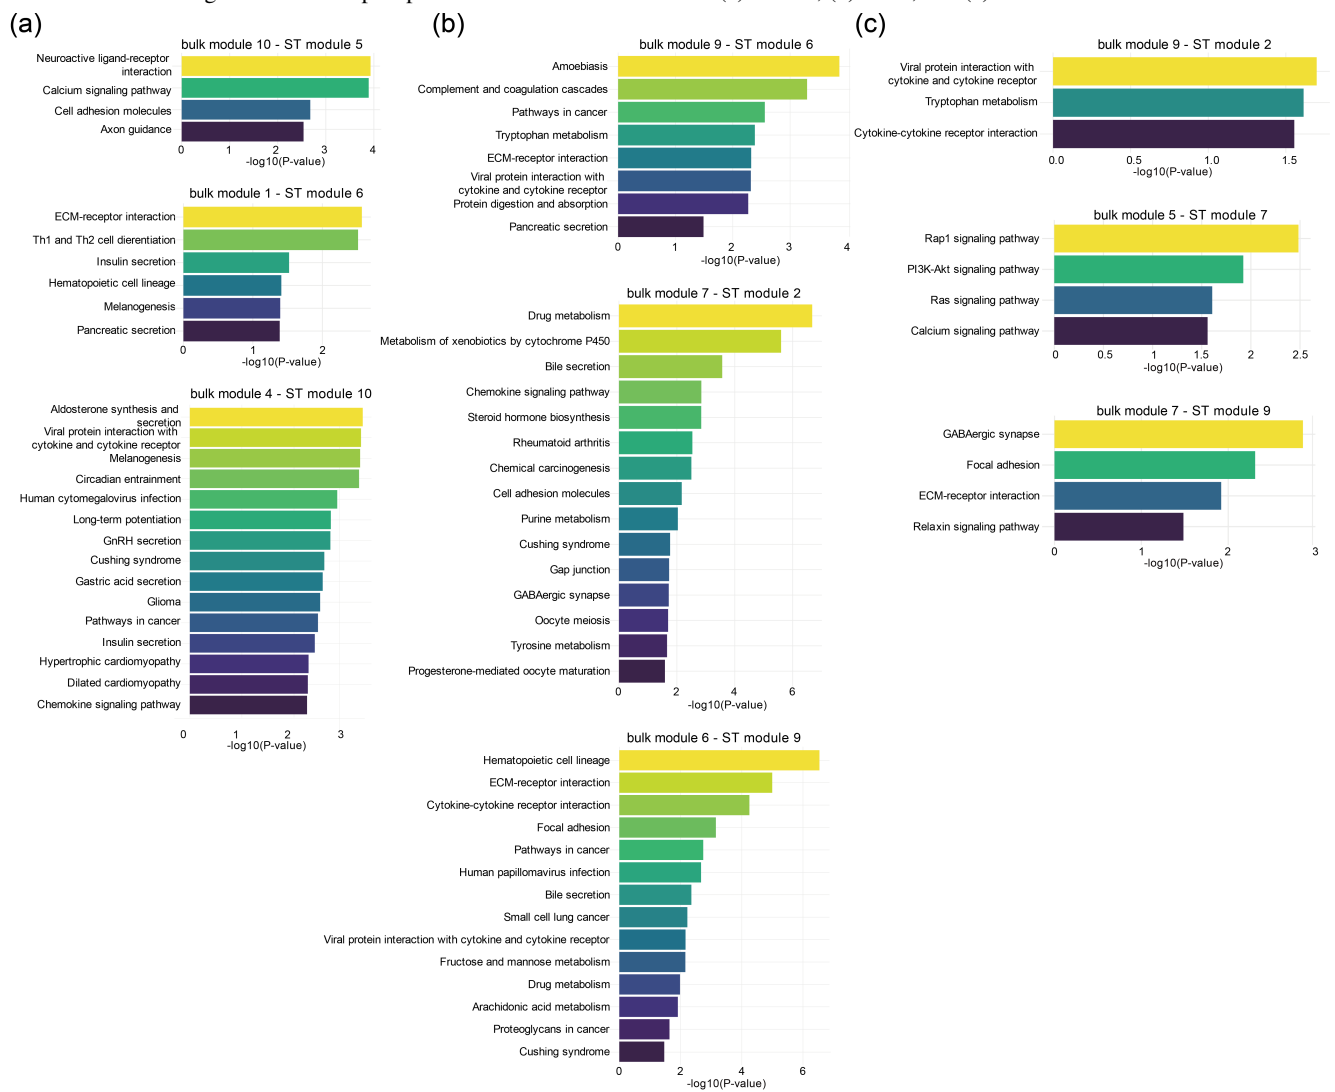

Figure 6. Visualization of KEGG pathways derived from bulk-ST module pairs in the (a) BRCA, (b) HCC, and (c) ccRCC datasets.

---

**Algorithm 1: Cross-domain Gene Module Alignment via Optimal Transport**


---

**Input** : Domain-specific gene similarity matrices:

$$\mathbf{A}^m \in \mathbb{R}^{D \times D}, m \in \{b, s\};$$

Learnable assignment matrices:

$$R^m \in \mathbb{R}^{D \times K_m}.$$

**Output:** Transport plan  $\Pi \in \mathbb{R}^{K_b \times K_s}$ ;  
Module-wise TOMs and OT loss.

**Step 1: Normalization of Gene Similarity Matrices.**

**for**  $m \in \{b, s\}$  **do**

$$\left[ \begin{array}{l} \text{Symmetrize: } A^m = \frac{1}{2}(A^m + A^{m\top}); \\ \text{Compute degree matrix: } D_{ii}^m = \sum_j A_{ij}^m; \\ \text{Graph normalization: } \hat{A}^m = D^{m-\frac{1}{2}} A^m D^{m-\frac{1}{2}}. \end{array} \right.$$

**Step 2: Soft Assignment to Gene Modules.**

Initialize  $R^m$  with row-stochastic constraints (via softmax).

**Step 3: Construction of Topological Overlap Matrices.**

**for**  $m \in \{b, s\}$  **do**

$$\left[ \begin{array}{l} \text{for } k = 1, \dots, K_m \text{ do} \\ \quad \left[ \begin{array}{l} \text{Compute TOM}_k^m[i, j] = \hat{A}_{ij}^m \cdot R_{ik}^m \cdot R_{jk}^m, \\ \quad 1 \leq i, j \leq D. \end{array} \right. \end{array} \right.$$

**Step 4: Computation of Module Distances.**

Compute compositional cost  $C_{ij}^{\text{org}}$ ;

Compute functional cost  $C_{ij}^{\text{fun}}$ ;

Fuse costs:  $C = C^{\text{org}} + C^{\text{fun}}$ ;

Normalize:  $C = C / \max(C)$ .

**Step 5: Entropic Optimal Transport via Sinkhorn Algorithm.**

Define uniform marginals:  $a_i = 1/K_b$ ,  $b_j = 1/K_s$ ;

Gibbs kernel:  $\mathbf{K} = \exp(-\mathbf{C}/\varepsilon)$ ;

Initialize:  $u = \mathbf{1}$ ,  $v = \mathbf{1}$ ;

**for**  $t = 1, \dots, T$  **do**

$$\left[ \begin{array}{l} u = a \odot (\mathbf{K}v); \\ v = b \odot (\mathbf{K}^\top u); \end{array} \right.$$

Compute transport plan:  $\Pi = \text{diag}(u) \mathbf{K} \text{diag}(v)$ .

**Step 6: Optimization and Backpropagation.**

Compute OT loss:  $\mathcal{L}_{OT} = \langle \Pi, \mathbf{C} \rangle$ ;

**return**  $\Pi, \{\text{TOM}_k^m\}, \mathcal{L}_{OT}$

---

Table 4. Comparison of model complexity and computational efficiency. We report the number of trainable parameters (MB), inference time (s), and training time per epoch (s) across BRCA datasets.

| Method     | Trainable Params | Inference Time (s / slide) | Training Time (s / epoch) |
|------------|------------------|----------------------------|---------------------------|
| SimpleNet  | 72.1 M           | 19 ± 0.04                  | 16.65 ± 0.15              |
| THOR       | 14.2 M           | 26.2 ± 2.4                 | 12.8 ± 0.9                |
| BIHN       | 23.5 M           | 11 ± 0.09                  | 4.1 ± 0.27                |
| AnoDDPM    | 90 M             | 40.0 ± 5.0                 | 24.5 ± 2.1                |
| FICT       | /                | /                          | /                         |
| Giotto     | /                | /                          | /                         |
| SEDR       | 10 M             | 2.0 ± 0.3                  | 8.0 ± 1.5                 |
| SpaGIC     | 8 M              | 0.8 ± 0.3                  | 2.2 ± 0.7                 |
| MEATRD     | 20 M             | 2.2 ± 0.6                  | 9.5 ± 1.8                 |
| STANDS     | 38 M             | 1.3 ± 0.4                  | 8.5 ± 2.0                 |
| STAIG      | 16 M             | 4.0 ± 0.6                  | 5.2 ± 0.3                 |
| STGIC      | 14 M             | 0.9 ± 0.3                  | 3.5 ± 0.8                 |
| stMMC      | 9 M              | 2.0 ± 0.4                  | 5.0 ± 0.6                 |
| bulk2space | 10 M             | 1.5 ± 0.5                  | 4.6 ± 1.2                 |
| STEM       | 13 M             | 0.9 ± 0.1                  | 4.0 ± 1.0                 |
| LocIT      | 11 M             | 1.1 ± 0.15                 | 2.5 ± 0.5                 |
| DARE-GRAM  | 12 M             | 1.3 ± 0.05                 | 3.5 ± 0.5                 |
| Ours       | 12.5 M           | 0.85 ± 0.10                | 4.0 ± 0.4                 |

Table 5. Summary statistics of spot and gene counts on the (a) BRCA, (b) HCC, and (c) ccRCC datasets.

| Dataset | Slice ID   | Spot Count | Cancerous Spots | Normal Spots | Gene Count |
|---------|------------|------------|-----------------|--------------|------------|
| BRCA    | A1         | 341        | 303             | 38           | 15045      |
|         | B1         | 228        | 63              | 165          | 15109      |
|         | C1         | 167        | 127             | 40           | 15557      |
|         | D1         | 255        | 139             | 116          | 15661      |
|         | E1         | 534        | 340             | 194          | 15701      |
|         | F1         | 659        | 577             | 82           | 14861      |
|         | G2         | 385        | 160             | 225          | 15258      |
|         | H1         | 491        | 187             | 304          | 15029      |
|         | HCC        | HCC-1L     | 2755            | 1754         | 1001       |
| HCC-2L  |            | 4642       | 2957            | 1685         | 16198      |
| HCC-2P  |            | 4661       | 1358            | 3303         | 16198      |
| HCC-2T  |            | 4695       | 1677            | 3018         | 16198      |
| HCC-3L  |            | 4750       | 3328            | 1422         | 17283      |
| HCC-4L  |            | 4092       | 1980            | 2112         | 16020      |
| HCC-5A  |            | 3437       | 490             | 2947         | 16010      |
| HCC-5B  |            | 3942       | 1916            | 2026         | 16010      |
| HCC-5C  |            | 3580       | 1350            | 2230         | 16010      |
| HCC-5D  | 4305       | 1301       | 3004            | 16010        |            |
| ccRCC   | GSM5924032 | 3829       | 3075            | 754          | 17943      |
|         | GSM5924033 | 4975       | 3130            | 1845         | 17943      |
|         | GSM5924035 | 4948       | 2417            | 2531         | 17943      |
|         | GSM5924036 | 4915       | 3389            | 1526         | 17943      |
|         | GSM5924037 | 3585       | 1574            | 2011         | 17943      |
|         | GSM5924039 | 4940       | 3881            | 1059         | 17943      |
|         | GSM5924040 | 4562       | 3161            | 1401         | 17943      |
|         | GSM5924041 | 4359       | 3186            | 1173         | 17943      |
